# Supplementary material
Source: publisher figshare collection journal article supplement (https://tandf.figshare.com/ndownloader/files/17563418)
Supplement: Supplementary file 1 [file 17563418]

**Table S5.** Risk of bias assessment of cohort and cross-sectional studies and the authors' judgements about each downgraded study.

| Author, year          | Was selection of exposed and non-exposed drawn from the same population?                                                                               | Can we be confident in the exposure assessment? | Can we be confident that the outcome of interest was not present at the beginning of study                                             | Did the study match exposed and unexposed for all variables that are associated with the outcome of interest or did the statistical analysis adjust for these prognostic variables? | Can we be confident in the assessment of the presence or absence of prognostic factors? | Can we be confident in the outcome assessment?  | Was the follow-up of cohorts adequate?                                 | Were co-interventions similar between groups?                 |
|-----------------------|--------------------------------------------------------------------------------------------------------------------------------------------------------|-------------------------------------------------|----------------------------------------------------------------------------------------------------------------------------------------|-------------------------------------------------------------------------------------------------------------------------------------------------------------------------------------|-----------------------------------------------------------------------------------------|-------------------------------------------------|------------------------------------------------------------------------|---------------------------------------------------------------|
| Cohort study          |                                                                                                                                                        |                                                 |                                                                                                                                        |                                                                                                                                                                                     |                                                                                         |                                                 |                                                                        |                                                               |
| Kamel et al. 2007     | Definitely yes.                                                                                                                                        | Probably not. Self-reported exposure.           | Probably yes.                                                                                                                          | Definitely not. No adjustment for major confounding factors.                                                                                                                        | Probably yes.                                                                           | Definitely not. Self-reported PD.               | Probably not. Loss of more than 10% of participants.                   | Definitely not. Major co-interventions were not investigated. |
| Cross-sectional study |                                                                                                                                                        |                                                 |                                                                                                                                        |                                                                                                                                                                                     |                                                                                         |                                                 |                                                                        |                                                               |
| Engel et al. 2001     | Definitely not. Different populations; exposed recruited from rural occupations vs. non-exposed recruited from occupations not related to agriculture. | Probably not. Self-reported exposure.           | Definitely not. Cross-sectional studies don't have a follow-up period, since the exposures and outcomes are assessed at the same time. | Probably not. The variable "duration of exposure" was not considered in the adjustments.                                                                                            | Probably yes.                                                                           | Definitely not. Only parkinsonism investigated. | Definitely not. Cross-sectional studies don't have a follow-up period. | Definitely not. Major co-interventions were not investigated. |

All answers as: definitely yes (low risk of bias), probably yes, probably not, definitely not (high risk of bias).
